# Supplementary material for: Clinical Characteristics and Risk Factors of Recurrent Mooren’s Ulcer
Source: Hindawi journal article supplement (doi:10.1155/2017/8978527), 2017-01-01
Supplement: f2 [file 8978527.f2.pdf]

### Additional Table

| Additional table The clinical condition of repeatedly recurrent patients |        |                    |     |                              |                                    |                               |                                      |                                             |                    |
|--------------------------------------------------------------------------|--------|--------------------|-----|------------------------------|------------------------------------|-------------------------------|--------------------------------------|---------------------------------------------|--------------------|
| ID                                                                       | sex    | Presentation times | age | Combined medical illness     | Clock hours of corneal involvement | Recurrence-free interval(day) | Signs of presentation                | Conditions of affected eyes                 | Surgical treatment |
| Patient1                                                                 | male   | 3                  | 56  | Chemical trauma of right eye | left, from 2 to 4                  | .                             | Ulcer of corneal graft               | NV                                          | AMT                |
|                                                                          |        |                    |     |                              | left, from 2 to 4                  | 12                            | Red, pain, decreased vision          | Impending perforating                       | Total LKP          |
|                                                                          |        |                    |     |                              | left, from 2 to 4                  | 9                             | Red, pain, decreased vision          | Fungal hyphae was found by corneal scraping | Total LKP          |
| Patient 2                                                                | female | 3                  | 47  | hemiplegia                   | right, from 2 to 6                 | .                             | Injured by branches                  | Nasal ulcer                                 | Partial LKP+CF     |
|                                                                          |        |                    |     |                              | right, from 5 to 6                 | 70                            | Foreign body sensation and pain      | Nasal ulcer, NV                             | Partial LKP+AMT    |
|                                                                          |        |                    |     |                              | right, from 3 to 5                 | 400                           | Foreign body sensation, red and pain | Inferior ulcer                              | Partial LKP        |
| Patient3                                                                 | male   | 3                  | 42  | healthy                      | left, from 3 to 11                 | .                             | Red, pain, decreased vision          | ulcer                                       | Total LKP+AMT      |

|           |        |   |    |         |                    |     |                                        |                                                    |               |
|-----------|--------|---|----|---------|--------------------|-----|----------------------------------------|----------------------------------------------------|---------------|
|           |        |   |    |         | left, from 3 to 8  | 16  | Epithelium deficiency of corneal graft | Epithelium deficiency of central corneal graft     | medicine      |
|           |        |   |    |         | left, from 3 to 5  | 7   | Epithelium deficiency of corneal graft | Epithelium deficiency of central corneal graft     | medicine      |
| Patient 4 | female | 3 | 18 | healthy | left, from 3 to 7  | .   | Red, pain, decreased vision            | NV                                                 | Partial LKP   |
|           |        |   |    |         | Left, From 5 to 7  | 90  | Epithelium deficiency of cornea        | epithelium deficiency of inferior cornea graft, NV | medicine      |
| Patient 5 | male   | 3 | 55 | healthy | left, from 5 to 6  | 330 | Recurrent ulcer                        | Ulcer, NV                                          | CF            |
|           |        |   |    |         | left, from 7 to 12 | .   | Red, pain, decreased vision            | NV, corneal graft tilt                             | Total LKP+AMT |
|           |        |   |    |         | left, from 7 to 12 | 25  | Epithelium deficiency of corneal graft | Epithelium deficiency of central corneal           | AMT           |

|              |      |   |    |                                  |                         |                        |                                                     |                                           |                    |
|--------------|------|---|----|----------------------------------|-------------------------|------------------------|-----------------------------------------------------|-------------------------------------------|--------------------|
|              |      |   |    |                                  |                         |                        |                                                     | graft, NV,<br>liquid<br>between<br>layers |                    |
|              |      |   |    |                                  | right, from 8 to 12     | 6 years and 1<br>month | Foreign body<br>sensation, red,<br>pain and tearing | ulcer, NV                                 | Partial LKP        |
| Patient<br>6 | male | 3 | 29 | Corneal ulcer of<br>affected eye | Right, from 5 to 13     | .                      | Red, pain,<br>decreased<br>vision                   | Nasal graft<br>tilt                       | Partial LKP        |
|              |      |   |    |                                  | right, from 4 to 8      | 27                     | Red, pain                                           | Nasal graft<br>tilt                       | Partial LKP+AMT    |
|              |      |   |    |                                  | right, from 4 to 8      | 138                    | Red, pain,<br>decreased<br>vision                   | Ulcer of<br>central<br>corneal<br>graft   | Partial LKP+AMP+CF |
| Patient<br>7 | male | 8 | 60 | gastric ulcer                    | right, from 3 to 2      | .                      | Red, pain,<br>decreased<br>vision                   | Peripheral<br>ulcer                       | Total LKP+AMT      |
|              |      |   |    |                                  | right, full cycle       | 25                     | Foreign body<br>sensation,                          | Peripheral<br>ulcer                       | Total LKP+AMT      |
|              |      |   |    |                                  | right, from 10 to<br>11 | 22                     | Foreign body<br>sensation,                          | Amniotic<br>dissolu<br>tion               | AMT                |
|              |      |   |    |                                  | right, from 10 to<br>13 | 75                     |                                                     | Corneal<br>graft                          | AMT                |

|           |        |   |    |              |                    |      |                              |                 |                         |
|-----------|--------|---|----|--------------|--------------------|------|------------------------------|-----------------|-------------------------|
|           |        |   |    |              |                    |      | dissolution                  |                 |                         |
|           |        |   |    |              | right, from 5 to 7 | 20   | ulcer                        | CF              |                         |
|           |        |   |    |              | right, full cycle  | 23   | ulcer                        | CF+AMT          |                         |
|           |        |   |    |              | right, from 5 to 9 | 42   | ulcer                        | Partial LKP+AMT |                         |
|           |        |   |    |              | left, 2 clock      | 150  | ulcer                        | Partial LKP+AMT |                         |
|           |        |   |    |              |                    |      | Red                          |                 |                         |
| Patient 8 | female | 8 | 50 | hypertension | right, from 5 to 7 | .    | Red and pain                 | ulcer           | Partial LKP             |
|           |        |   |    |              | right, from 4 to 8 | 570  | Foreign body sensation, pain | ulcer, NV       | Partial LKP+AMT         |
|           |        |   |    |              | right, from 2 to 6 | 600  | red                          | ulcer, NV       | AMT                     |
|           |        |   |    |              | right, from 2 to 8 | 495  | Foreign body sensation,      | ulcer           | AMT                     |
|           |        |   |    |              | right, from 3 to 7 | 222  | Tearing, photophobia         | ulcer           | Partial LKP             |
|           |        |   |    |              | right, 8 clock     | 130  | Red, photophobia             | ulcer, NV       | AMT                     |
|           |        |   |    |              | right, from 6 to 8 | 123  | Red, tearing and photophobia | ulcer, NV       | medicine                |
|           |        |   |    |              | right, from 6 to 8 | 48   | Red, pain, decreased vision  | ulcer           | CF                      |
| Patient 9 | male   | 5 | 57 | healthy      | left, from 7 to 10 | .    | Red, pain, decreased vision  | ulcer           | Partial LKP             |
|           |        |   |    |              | left, from 7 to 1  | 1095 | Red, pain and tearing        | ulcer, NV       | CF                      |
|           |        |   |    |              | left, from 7 to 10 | 50   | Foreign body sensation       | ulcer,          | Partial LKP perforating |

|  |                     |    |                                 |           |             |
|--|---------------------|----|---------------------------------|-----------|-------------|
|  | right, 7 clock      | 70 | Foreign body sensation, tearing | ulcer, NV | medicine    |
|  | right, from 5 to 10 | 50 | Foreign body sensation          | ulcer     | Partial LKP |

Note: LKP, Lamellar Keratoplasty; AMT, Amniotic membrane transplantation; CF, Conjunctival Flap; NV, new vessels.
